# Supplementary material for: Bacterial Antigens Reduced the Inhibition Effect of Capsaicin on Cal 27 Oral Cancer Cell Proliferation
Source: MDPI journal article supplement (doi:10.3390/ijms22168686), 2021-08-12
Supplement: s1 [file s1]

# Bacterial Antigens Reduced the Inhibition Effect of Capsaicin on Cal 27 Oral Cancer Cell Proliferation

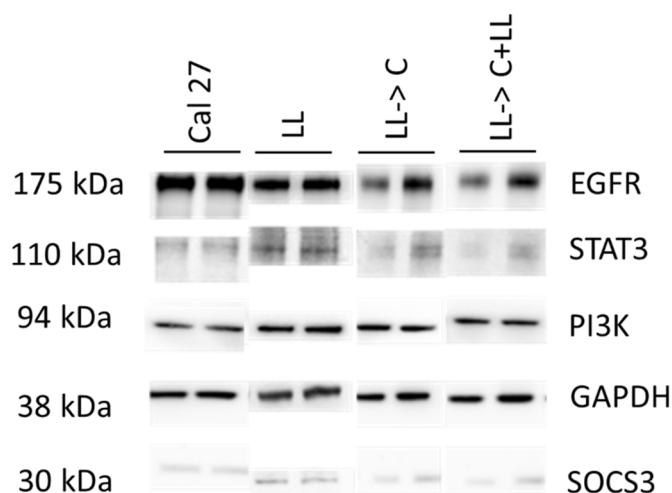

**Figure S1.** Western blot image of different tumour suppressor and proliferation related proteins in Cal 27. Cal 27 cells were stimulated with LPS + LTA (LL) for 72 h, and then treated with capsaicin for 24 h in the absence (LL -> C) or presence (LL -> C+LL) of oral bacterial antigens. All the gene expressions are relative to Cal 27 cells without bacterial antigen stimulation and capsaicin treatment. C = capsaicin, LL = LPS + LTA. Letter before arrow represents pre-stimulation e.g., LL -> C is LL pre-stimulation and then treatment with capsaicin.

**Table S1.** Detail of materials and reagents used in the study.

| Reagent/Kit                                           | Manufacturer        | LOT        | Catalogue No. | Description                                                                                                                    |
|-------------------------------------------------------|---------------------|------------|---------------|--------------------------------------------------------------------------------------------------------------------------------|
| <b>Growth Medium and Buffers for the Cell Culture</b> |                     |            |               |                                                                                                                                |
| Keratinocyte-Serum Free Medium (K-SFM)                | Life Technologies   | -          | 1700504       | Contains 2.5 µg human recombinant epithelial growth factor (EGF) (0.035 µg/µL) and 25 mg bovine pituitary extract (15.1 mg/mL) |
| Foetal bovine serum (FBS)                             | Life Technologies   | -          | 10099141      | Endotoxin level: ≤ 5 EU/mL.<br>Haemoglobin level: ≤ 30 mg/dL (levels routinely ≤ 25 mg/dL).                                    |
| 1X phosphate buffered saline (PBS)                    | Gibco               | -          | 20012-027     | 1.5 mM KH <sub>2</sub> PO <sub>4</sub> ; 155.2 mM Cl; 2.7 mM Na <sub>2</sub> HPO <sub>4</sub> ·7H <sub>2</sub> O (pH 7.2)      |
| Trypsin-EDTA                                          | Sigma Life Sciences | SLBZ7364   | T4049         | 0.25%, bioreagent 2.5 gm porcine trypsin and 0.2 gm EDTA; 4 Na per litre of Hank's balanced salt solution with phenol red      |
| Dulbeccos Modified Eagles Medium (DMEM)               | Gibco               | -          | 11960-044     | 4500 mg/L glucose, sodium pyruvate and sodium bicarbonate                                                                      |
| Penicillin-streptomycin (P/S) solution                | Life Technologies   | 2068825    | 15140-148     | 10,000 units/mL penicillin and 10,000 µg/mL streptomycin                                                                       |
| <b>Drugs and Bacterial Antigens</b>                   |                     |            |               |                                                                                                                                |
| LPS 25 mg                                             | Sigma-Aldrich       | -          | L2630         | Lipopolysaccharides from <i>Escherichia coli</i> O111:B4, water soluble                                                        |
| LTA 5 mg                                              | Sigma-Aldrich       | 049M4155V  | L3140         | Lipoteichoic acid from <i>Streptococcus pyogenes</i> , water soluble                                                           |
| Capsaicin 250 mg                                      | Sigma-Aldrich       | MKBV4243V  | 360376        | 8-Methyl-N-vanillyl-trans-6-nonenamide, polar compound soluble in organic solvent                                              |
| <b>Proliferation Assay</b>                            |                     |            |               |                                                                                                                                |
| RealTime-Glo MT Cell Viability Assay                  | Promega             | 0000383765 | G9712         | 10 × 100 reactions                                                                                                             |
| MT Cell Viability Substrate, 1000X                    | Promega             | 0000362418 | G971A         | 10 µL solution supplied in opaque tubes                                                                                        |
| NanoLuc Enzyme, 1000X                                 | Promega             | 0000362418 | E499A         | 0.4 mg/mL                                                                                                                      |

|                                                               |                                       |                        |               |                                                                                                                                                                                            |
|---------------------------------------------------------------|---------------------------------------|------------------------|---------------|--------------------------------------------------------------------------------------------------------------------------------------------------------------------------------------------|
| Trypan blue stain 0.4%                                        | Invitrogen                            | 2117644                | T10282        | Trypan blue 0.4% to identify dead cells via colorimetric detection; supplied as 21 mL vials                                                                                                |
| Crystal violet acetate                                        | Sigma Aldrich                         | 69H3634                | C5042         | 9(amino-5-imino-5H-benzo[a] phenoxazine acetate salt supplied as powder                                                                                                                    |
| Methanol                                                      | Chem-Supply                           | UN1230                 | MA004-2.5L-P  | Analytical reagent                                                                                                                                                                         |
| Cell Countess cell-counting chamber slides                    | Invitrogen                            | I31A9 Q422             | C10283        | For live cell and dead cell percentage via calorimetric detection                                                                                                                          |
| <b>Apoptotic Assay</b>                                        |                                       |                        |               |                                                                                                                                                                                            |
| CellEvent Caspase-3/7 Green Detection Reagent 25 $\mu$ L      | Invitrogen                            | 2119122                | C10723        | 2.0 mM solution in DMSO                                                                                                                                                                    |
| <b>Determination of Proliferation Related Gene Expression</b> |                                       |                        |               |                                                                                                                                                                                            |
| Pure Link RNA mini kit                                        | Invitrogen                            | 2137737                | 12183018A     | Total RNA extraction                                                                                                                                                                       |
| Trizol reagent                                                | Invitrogen                            | 260702                 | 15596026      | Total RNA extraction                                                                                                                                                                       |
| Ethyl alcohol                                                 | Sigma Aldrich                         | SHBH7551               | E7023-1L      | CH <sub>3</sub> CH <sub>2</sub> OH; pure                                                                                                                                                   |
| SSIV VILO Master mix W/ EzDNASE                               | Invitrogen                            | 00831746               | 11766050      | DNA digestion and Reverse transcription PCR                                                                                                                                                |
| PowerUp SYBR Master Mix, 5 ml                                 | Invitrogen                            | 00799448               | A25742        | Real-time PCR Master Mix                                                                                                                                                                   |
| Chloroform                                                    | BDH AnalaR                            | 19073                  | VWRC22711.260 | CHCl <sub>3</sub> , contains 1% <i>v/v</i> of ethanol as preservative                                                                                                                      |
| MicroAmp Fast plate                                           | Applied Biosciences, Life Biosystems  | -                      | 4346907       | 96-well reaction plate (0.1 mL)                                                                                                                                                            |
| Optical adhesive cover                                        | Applied Biosystems, Life Technologies | -                      | 4360954       | qPCR-compatible optical adhesive covers                                                                                                                                                    |
| <b>Protein Estimation</b>                                     |                                       |                        |               |                                                                                                                                                                                            |
| Pierce BCA Protein Assay kit                                  | Thermo Fisher Scientific              | UD2969                 | 23225         | Two-component, high-precision, detergent-compatible protein assay for determination of protein concentration                                                                               |
| <b>Western Blot</b>                                           |                                       |                        |               |                                                                                                                                                                                            |
| Human/Mouse SOCS-3 MAb (Clone 516919), 25 $\mu$ g             | R&D Systems                           | CCDL0219051            | MAB5696       | Purified mouse monoclonal IgG                                                                                                                                                              |
| Human/Mouse/Rat STAT3 MAb (Clone 232209), 25 $\mu$ g          | R&D Systems                           | JXW041912A             | MAB1799       | Purified mouse monoclonal IgG                                                                                                                                                              |
| Human PI 3-Kinase p110 beta MAb (Clone 269020), 25 $\mu$ g    | R&D Systems                           | VCK042001A             | MAB2686       | Purified mouse monoclonal IgG                                                                                                                                                              |
| Anti-G3PDH/GAPDH (T0893), 20 $\mu$ L                          | R&D Systems                           | 20481                  | 2275-PC-020   | Polyclonal rabbit antibody                                                                                                                                                                 |
| Human EGF R/ErbB1 Polyclonal Ab, 25 $\mu$ g                   | R&D Systems                           | AUC1118111             | AF231         | Affinity purified goat IgG                                                                                                                                                                 |
| Novex Sharp pre-stained protein standard                      | Life Technologies                     | 2115579                | LC5800        | consists of 12 pre-stained protein bands in molecular weight range 3.5-260 kDa                                                                                                             |
| Clarity Western ECL Substrate                                 | Bio-Rad                               | 102031366<br>102031363 | 1705060       | Supplied in two parts: peroxide solution and luminol/enhancer solution                                                                                                                     |
| Ponceau S solution                                            | Sigma-Aldrich                         | SLCB3855               | P7170-1L      | Bioreagent 0.1% ( <i>w/v</i> ) supplied in 5% acetic acid: C <sub>22</sub> H <sub>12</sub> N <sub>4</sub> Na <sub>4</sub> O <sub>13</sub> S <sub>4</sub>                                   |
| Anti-goat IgG HRP conjugate                                   | R&D Systems                           | XGD10161011            | HAF009        | Secondary antibody specific to primary antibody source                                                                                                                                     |
| Anti-rabbit IgG HRP conjugate                                 | R&D Systems                           | FIN1819021             | HAF008        | Secondary antibody specific to primary antibody source                                                                                                                                     |
| Anti-mouse IgG HRP conjugate                                  | R&D Systems                           | WVA00919011            | HAF018        | Secondary antibody specific to primary antibody source                                                                                                                                     |
| NuPAGE LDS sample buffer (4X)                                 | Invitrogen                            | 1981103                | NP0007        | Used to prepare protein samples for denaturing gel electrophoresis with Bis-Tris or Tris-Acetate gels. It contains lithium dodecyl sulfate, pH 8.4; contains Coomassie G250 and Phenol Red |
| NuPAGE 10% bis-tris gel                                       | Invitrogen                            | 19050170               | NP0302BOX     | 1 mm $\times$ 12 well                                                                                                                                                                      |
| NuPAGE 10% bis-tris gel                                       | Invitrogen                            | 19071070               | NP0301BOX     | 1 mm $\times$ 10 well                                                                                                                                                                      |
| 20X NuPAGE MOPS SDS Running Buffer                            | Invitrogen                            | -                      | NP0001        | 500 mL contains 50 mM MOPS, 50 mM Tris Base, 0.1% SDS, 1 mM EDTA, pH 7.7                                                                                                                   |

**Table S2.** Details of oral cell lines.

| Cell Line      | OKF6                                      | CAL 27                         |
|----------------|-------------------------------------------|--------------------------------|
| Source         | Cellosaurus                               | ATCC                           |
| Specimen site  | Floor of mouth; normal oral keratinocytes | Tongue squamous cell carcinoma |
| Type           | Immortalised normal oral cells            | Primary                        |
| Treatment      | No                                        | No                             |
| Sex            | Male                                      | Male                           |
| Age (years)    | 57                                        | 56                             |
| Culture media  | K-SFM media + growth factors              | DMEM + 10% FBS + P/S           |
| Freezing media | 50% FBS + 10% DMSO + DMEM                 | 50% FBS + 10% DMSO + DMEM      |

**Table S3.** Primers used in RT-qPCR for proliferation factors.

| Gene Name | Primer Pair Sequences (5' to 3') |
|-----------|----------------------------------|
| SOCS3     | GCGCGAAGGCTCCTTTGTG              |
|           | GGGGGGCTGGTCCCGAATC              |
| STAT3     | GGACATCAGCGGTAAGACCC             |
|           | CTCTGGCCGACAATACTTTC             |
| EGFR      | AGCTACGGGGTGACTGTTTG             |
|           | GAACTTTGGGCGACTATCTG             |
| GAPDH     | GACAGTCAGCCGCATCTTCT             |
|           | ACCAAATCCGTTGACTCCGA             |
| PI3KCA    | TGGGGATGATTTACGGCAAG             |
|           | TCCCACACAGTCACCGATTGA            |
